# Supplementary material for: Tripeptide-based macroporous hydrogel improves the osteogenic microenvironment of stem cells
Source: Royal Society of Chemistry journal article supplement (doi:10.1039/d1tb01175h), 2021-01-01
Supplement: d1tb01175h1.pdf [file d1tb01175h1.pdf]

**Supporting Information**

**Tripeptide-based macroporous hydrogel improves the osteogenic  
microenvironment of stem cells**

Qian Li<sup>a, b</sup>, He Zhang<sup>b</sup>, Jijia Pan<sup>a</sup>, Binhong Teng<sup>b</sup>, Ziqian Zeng<sup>b</sup>, Yang Chen<sup>a</sup>, Yu Hei<sup>c</sup>,  
Siqi Zhang<sup>d</sup>, Shicheng Wei<sup>a, b\*</sup>, Yuhua Sun<sup>e, f \*</sup>

<sup>a</sup> Laboratory of Biomaterials and Regenerative Medicine, Academy for Advanced  
Interdisciplinary Studies, Peking University, Beijing 100871, China

<sup>b</sup> Department of Oral and Maxillofacial Surgery, Central Laboratory, Peking University  
School and Hospital of Stomatology, Beijing 100081, China

<sup>c</sup> College of Engineering, Peking University, Beijing 100871, China

<sup>d</sup> Institute of Molecular Medicine, Peking University, Beijing 100871, China

<sup>e</sup> School of Stomatology, Xuzhou Medical University, Xuzhou 221004, China

<sup>f</sup> Department of Stomatology, The Affiliated Hospital of Xuzhou Medical University,  
Xuzhou 221004, China

**\* Corresponding Author**

Prof. Shicheng Wei

Department of Oral and Maxillofacial Surgery, Central Laboratory, Peking University  
School and Hospital of Stomatology, Beijing 100081, China

Tel & Fax: +86 10 82195771; E-mail: [sc-wei@pku.edu.cn](mailto:sc-wei@pku.edu.cn)

Associate Prof. Yuhua Sun

- 1 Department of Stomatology, The Affiliated Hospital of Xuzhou Medical University,
- 2 Xuzhou 221004, China
- 3 E-mail: [yuhua.sun@xzhmu.edu.cn](mailto:yuhua.sun@xzhmu.edu.cn)

## 1 In vitro degradation of gelatin microspheres

2 The degradation properties of the cross-linked microspheres were determined by  
3 immersing dried test samples in PBS (5mg/mL). Incubate the cross-linked GMs in a  
4 37°C incubator for 1, 3, 5, and 7 days. The weight loss of test microspheres due to  
5 degradation was quantified as follows:

$$6 \quad \text{Weight loss (\%)} = \frac{W_1 - W_2}{W_1} \times 100\%$$

7 where,  $W_2$  is the weight of degraded test microspheres lyophilized for 24 h.

8

9 Figure S1. Degradation curves of GMs with different cross-linking time.

10

11 Figure S2. The effect of different concentrations of QK/GM encapsulated in RA (1, 5,  
12 10 mg/mL) on HUVECs proliferation.

13

14 Figure S3. Survival and proliferation of hMSCs encapsulated in hydrogel. (A) Live cell  
15 staining images of hMSCs cultured in hydrogel for 3 days. (B) In situ  
16 immunofluorescence staining for F-actin of hMSCs cultured in hydrogel for 7 days.

17

18 Figure S4. In situ immunofluorescence staining of hMSCs cultured in UGM for 7  
19 days.

20

21 **Table S1. Presenting the primer used for qRT-PCR**

| Primers | Forward (5' - 3') (bp) | Reverse (5' - 3') (bp) |
|---------|------------------------|------------------------|
| 28S     | CCCAGTGCTCTGAATGTCAA   | AGTGGAATCTCGTTCATCC    |
| rRNA    | (20)                   | (20)                   |

---

|               |                      |                       |
|---------------|----------------------|-----------------------|
| <b>ALP</b>    | CAACCCTGGGGAGGAGAC   | GCATTGGTGTTGTACGTCTTG |
|               | (18)                 | (21)                  |
| <b>Col1a1</b> | AGACACTGGTGCTAAGGGAG | GACCAGCAACACCATCTGCG  |
|               | AG (22)              | (20)                  |
| <b>Runx2</b>  | CCGCCTCAGTGATTAGGGC  | GGGTCTGTAATCTGACTCTGT |
|               | (20)                 | CC (23)               |
| <b>OCN</b>    | CCTGAAAGCCGATGTGGT   | AGGGCAGCGAGGTAGTGA    |
|               | (18)                 | (18)                  |
| <b>OPN</b>    | CTGGAACCCCAGAGCGAAAT | GCCTCCTCACACAGGGTAAC  |
|               | (21)                 | (20)                  |

---
